# Supplementary material for: SIRPα Blockade Improves the Antitumor Immunity of Radiotherapy in Colorectal Cancer
Source: Research Square preprint supplement (doi:10.21203/rs.3.rs-2096693/v1), 2022-12-07
Supplement: Supplementary file 1 [file 8b92502de8136d2d0a582d82.docx]

**Supplementary Figure 1. Flow cytometric characterization of intratumoral Tregs and CD8+ cells.** C57BL/6 mice were treated as described in Figure 3. (A) Quantification of Tregs (CD25+Foxp3+) as a proportion of CD4+ cells in the tumor. (B) Quantification of TIM-3+ cells as a proportion of CD8+ cells in the tumor. (C) Quantification of CD39+ cells as a proportion of CD8+ cells in the tumor. All plots show a representative sample (left) and are expressed as a mean with 5 plotted replicates (right). Experiments were repeated twice. Statistical differences were assessed using the unpaired Student t test. ** *P* < 0.01.

**Supplementary Figure 2.** Survival of untreated naive (n = 8) or MC38 tumor-free mice treated with the αSIRPα+HRT+αPD-1 combination (n = 10) and rechallenged with 5 × 106 MC38 cells 70 days after first tumor inoculation.
